1 **A simple and dynamic thermal gradient device for measuring thermal**  
2 **performance in small ectotherms**

3

4 Marshall W. Ritchie\*, Jeff W. Dawson, Heath A. MacMillan

5 Department of Biology, Carleton University, Ottawa, Canada, K1S 5B6

6

7 \*Author for correspondence: [MarshallRitchie@cmail.carleton.ca](mailto:MarshallRitchie@cmail.carleton.ca)

8 **Keywords:** thermal gradient; thermal tolerance; thermal performance; temperature; ectotherms

## 9 **Abstract**

10 The body temperature of ectothermic animals is heavily dependent on environmental  
11 temperature, impacting fitness. Laboratory exposure to favorable and unfavorable temperatures  
12 is used to understand these effects, as well as the physiological, biochemical, and molecular  
13 underpinnings of variation in thermal performance. Although small ectotherms, like insects, can  
14 often be easily reared in large numbers, it can be challenging and expensive to simultaneously  
15 create and manipulate several thermal environments in a laboratory setting. Here, we describe  
16 the creation and use of a thermal gradient device that can produce a wide range of constant or  
17 varying temperatures concurrently. This device is composed of a solid aluminum plate and  
18 copper piping, combined with a pair of programmable refrigerated circulators. As a simple  
19 proof-of-concept, we completed single experimental runs to produce a low-temperature survival  
20 curve for flies (*Drosophila melanogaster*) and explore the effects of daily thermal cycles of  
21 varying amplitude on growth rates of crickets (*Gryllobates sigillatus*). This approach avoids the  
22 use of multiple heating/cooling water or glycol baths or incubators for large-scale assessments of  
23 organismal thermal performance. It makes static or dynamic thermal experiments (e.g., creating a  
24 thermal performance or survival curves, quantifying responses to fluctuating thermal  
25 environments, or monitoring animal behaviour across a range of temperatures) easier, faster, and  
26 less costly.

## 27 **Introduction**

28           The thermal environment can directly impact organismal survival and fitness, and small  
29 ectotherms can respond to changing thermal environments by altering behaviour or physiology  
30 within the lifetime of an individual or over evolutionary time [1,2]. Our understanding of how  
31 animals respond to their thermal environment has come largely from studies focused on small  
32 ectothermic animals with short generations times that can be reared rapidly and inexpensively in  
33 the laboratory. As insects are easily manipulated and maintained in the lab, model insect species  
34 are widely used for studies of the genetics, molecular biology, environmental physiology,  
35 behaviour, and evolution of thermal performance traits [3–7]. Laboratory studies of *Drosophila*  
36 thermal tolerance, for example, have recently allowed for investigation of the molecular or  
37 physiological processes that limit their biogeography, and how limits to thermal performance  
38 may evolve following changes in abiotic conditions [4,8–10].

39           A common measure of thermal tolerance is survival following high or low-temperature  
40 exposure. Survival experiments are typically assessed using one of two different experimental  
41 designs. The first is prolonged exposure to a single lethal temperature [11,12]. This approach is  
42 limited to the selected exposure temperature, which may or may not be the ideal temperature to  
43 measure the thermal tolerance of the chosen species, or discriminate variation in thermal  
44 tolerance among treatment groups. An alternative approach is to use a range of exposure  
45 temperatures [13–16]. This approach is used to generate thermal tolerance or performance curves  
46 by examining, for example, the effects of temperature on survival [17], growth rates [18],  
47 reproductive capacity [8], motor performance [19] or behaviour [20]. In these experiments,  
48 different individuals are exposed to different static temperatures to examine underlying

49 temperature effects on life history and to understand better how prior thermal experiences might  
50 influence these relationships [19,21,22].

51 In nature, animals do not experience a drastic increase or decrease in temperature but  
52 rather experience gradual temperature increases or decreases as well as non-linear and stochastic  
53 temperature profiles [2,23]. These predictable or unpredictable changes in temperature affect  
54 insects differently than would a sudden increase or decrease in temperature applied in a typical  
55 lab setting [23]. Experiments involving ramping temperatures are now common [24–26], and  
56 there is concern over the effects of the rate of temperature change on the experimental outcome.  
57 In light of this concern, some authors have directly measured the effects of different ramping  
58 rates on thermal performance traits [27–29], choosing a handful of ramping rates to test.  
59 Ramping temperatures are just one example that demonstrates a growing appreciation for  
60 thermal performance and evolution studies that embrace complexity of natural thermal  
61 environments as well as the complexity of physiological responses to those environments [30].  
62 Experimental design, however, can strongly influence research outcomes, and several factors  
63 limit our ability to test a wide range of conditions at once.

64 When performing an experiment that requires multiple constant temperatures or  
65 programmed temperature changes over time, it can be challenging to maximize the number of  
66 different treatments available because of limited equipment and keep unintended sources of  
67 variation among treatments to a minimum. Variation in the resulting data from such experiments  
68 can come from either using multiple heating/cooling devices all running at different temperatures  
69 or having to use individual specimens from multiple successive generations or of varying age  
70 because of limited capacity or versatility of the equipment or time. While accounting for these  
71 variables statistically is sometimes an option, controlling for them is preferred. In addition to

72 potentially impacting data quality, equipment limitations can significantly increase the resources  
73 and time required to perform a thermal experiment, thereby restricting both data quality and  
74 quantity.

75         Here, we describe the manufacturing and testing of a thermal gradient plate and  
76 associated thermal bath setup that can streamline thermal experiments. We believe that our  
77 design allows for the rapid and accurate quantification of a variety of organismal thermal  
78 tolerance or performance metrics. By connecting two heated and/or refrigerated circulating baths  
79 to either end of a custom aluminum plate, stable and predictable thermal gradients can be formed  
80 (documented here and previously with various designs, see: [31,32]). If one or both of those  
81 circulating baths can also be programmed, however, a single setup can become a powerful tool  
82 for examining the impacts of both static and dynamic thermal conditions on organismal  
83 performance and fitness. We describe the utility of this system from our perspective as insect  
84 thermal biologists but small organisms or samples such as other terrestrial or aquatic  
85 invertebrates, plants, unicellular eukaryotes, bacteria, cell cultures, or even enzymes could be  
86 studied with this approach. Labor-intensive experiments can be easily and rapidly accomplished  
87 using the described system in a single run. As a proof-of-concept, we generated low-temperature  
88 survival curves of male and female *D. melanogaster* (typically produced using multiple cooling  
89 baths) and examined how the amplitude of diurnal temperature cycles influenced the growth  
90 rates of tropical house crickets (*Gryllodes sigillatus*).

## 91 **Materials and Methods**

### 92 ***Building the plate***

93           The thermal plate was created using parts (Table 1) that were assembled in the  
94 laboratory. These pieces are readily available from a hardware store and/or publicly accessible  
95 metal supplier or machine shop. The gradient device was built using a 91.4 cm (36") x 45.7 cm  
96 (18") x 2.5 cm (1") solid aluminum plate (Figure 1A). We milled channels on each side and at  
97 both ends of the plate (12 channels in total; Figure 1B). Given the scale of the plate, this milling  
98 was the most technically demanding part of the build but could be easily completed by a local  
99 machine shop if necessary. Each channel had dimensions of 0.95 cm (3/8") x 0.95 cm (3/8") and  
100 sets of 3 channels were milled 0.95 cm (3/8") apart. Copper tubing (0.95 cm thick (3/8" OD) x  
101 49 cm (c. 19.25") long) was gently hammered into the channels, being careful not to damage the  
102 tubing in any way that would block fluid flow or cause a leak. Hammering was done until the  
103 copper tubing was flat with the surface of the plate (Figure 1A). We left 1.65 cm (c. 0.5") of  
104 tubing overhang on each side of the plate for plumbing connections (Figure 1C).

105           After several attempts, we could not bend our copper tubing into a 'U' shaped  
106 configuration without damaging it and therefore opted to construct simple manifolds to complete  
107 the plumbing circuit (Figure 1D). Aluminum blocks (3.8 cm (1.5") x 1.3 cm (1.5") x 1.3 cm  
108 (1/2")) were used to create the custom manifolds. Two 0.95 cm (3/8") holes were drilled adjacent  
109 to each other in the long face of the block (Figure 1D). The spacing of the holes aligned with the  
110 spacing of the adjacent channels in the aluminum block. Another hole was drilled in one end face  
111 deep enough into the block so as to create a cavity connecting the first two holes (Figure 1D).  
112 This hole was drilled with a 5/16" drill bit to allow the hole to be tapped to accommodate a 3/8"-  
113 16 threaded brass plug. Two shorter lengths (c. 2 cm) of 0.95 cm (3/8" OD) copper tubing were

114 press-fit into the adjacent holes and a 3/8"-16 brass plug was installed in the threaded end-face  
115 hole using sealant to prevent leaking when fluid was under pressure. The manifolds were then  
116 connected to the ends of the copper tubing in the aluminum plate with 2.5 cm (c. 1") lengths of  
117 0.95 cm (3/8" ID) clear vinyl tubing (Figure 1C). We additionally secured the vinyl tubing  
118 connections with steel wire.

119 A benefit of using the manifolds attached to the main plate via short lengths of tubing  
120 was to compensate for slight variations in spacing of the channels and tubing, and to avoid the  
121 possibility of the seals breaking with thermal expansion of the plate.

122 The remaining two ends of the copper tubing at each end of the plate were attached to  
123 their respective cooling baths. By connecting the manifolds to the plate in a specific arrangement  
124 fluid was directed through all 6 of the lengths of tubing at each end of the plate (Figure 1F).  
125 Extruded polystyrene foam board (rigid foam-board insulation) was then cut to fit all sides of the  
126 plate to leave an approximately 7.5 cm (3") airspace between the top of the aluminum plate and  
127 the bottom of the lid. The air gap allowed space for the placement of samples or metal tins  
128 containing samples (described below).

129

### 130 ***System testing***

131 The plate was tested to ensure that a stable and reproducible temperature gradient could  
132 be formed on the surface of the aluminum plate. First, eight type-K thermocouples were equally  
133 spaced along the length of the plate at the mid-line of the plate width (Figure 2A). The  
134 positioning of each probe was pseudo-randomized during each replicate to minimize bias from  
135 using the same probe in the same location. Three different thermal gradients were independently  
136 tested to examine the functional range of the device. Three gradients (0°C to +10°C, 0°C to  
137 +25°C, and 0°C to +40°C) were each tested three times, for 2 h (each replicate). We also

138 measured temperatures across the width of the plate at the same locations across the length of the  
139 plate.

140 We tested the plate using three different dynamic programs that were selected based on  
141 their utility to insect thermal biologists. The first was two ramping tests from +20°C to +40°C  
142 over 1 h and 2 h at one end of the plate while the other was held constant at +20°C (simulating a  
143 ramp to acute heat stress). The second dynamic test was five cycles of +10°C to +30°C at one  
144 end while the other end was held constant at +20°C. To simulate rapid thermal cycles, this  
145 cycling was left to repeat five times, and each cycle lasted a total of two hours from +10 to  
146 +30°C and vice versa, but diurnal cycles as used for our cricket experiment (below) are  
147 commonly longer. The third dynamic test was a fluctuating thermal regime (FTR). The FTR was  
148 done by forming a 0 to +25°C gradient during a cool period, followed by an identical warm  
149 period across the plate at +25°C. FTR programs are commonly used and studied in the context of  
150 long-term insect storage [33–35]. Each of these programs was tested and recorded once.

151 We next turned our attention to the practical use of the plate. We tested whether small  
152 animal containers (glass *Drosophila* vials), could be placed directly on the plate, or if an  
153 intermediate containment vessel was needed to achieve stable temperatures inside the containers.  
154 We expected issues to be most pronounced with temperature gradients across a sample container  
155 that deviated far from room temperature, so these tests were conducted at low temperatures. With  
156 a gradient of -10 to +7°C formed across the plate, glass vials (25 mm diameter x 95 mm height)  
157 were placed at the -10°C end of the plate. We used type-K thermocouples to measure the air in  
158 the vial, and the bottom of the glass along with the plate. Since this experiment indicated that  
159 contact with the plate alone was not sufficient to establish stable homogeneous temperatures  
160 inside sample vials, we devised an alternative approach. We opted to use narrow troughs



161 containing a mixture of ethylene glycol and water. We created the troughs (39.37 x 7.62 x 7.62  
162 cm) using sheet metal (0.9 mm thick), rivets, and silicone caulking. The troughs were placed on  
163 the plate with the vials which were then placed in glycol in the troughs. This approach produced  
164 stable and homogenous temperatures throughout the glass surface of the vial as well as the air  
165 inside the vial.

166

### 167 ***Proof of concept 1: Drosophila cold tolerance***

168 The population of *Drosophila melanogaster* used [36] were reared in 200 mL plastic  
169 bottles containing 50 mL of a banana-based diet (containing primarily banana, active yeast, corn  
170 syrup, and barley malt). Flies were kept in an incubator at +25°C in a 12 h:12 h light/dark cycle.  
171 Flies were allowed to lay fresh eggs by transferring ~800 adult flies into a population cage  
172 containing food in a petri dish and were left for 24 h before being removed. This process resulted  
173 in roughly 1200 eggs laid in each cage. The food containing the eggs was divided up and placed  
174 into fresh glass vials (approx. 100 eggs per vial).

175 All flies were sorted by sex on the day of adult emergence under light CO<sub>2</sub>. Flies were  
176 not exposed to CO<sub>2</sub> for more than 10 min to ensure no long-term physiological effects [37,38].  
177 Females were transferred in groups of 10 into glass vials with 7 mL of fresh banana food (mainly  
178 made up of bananas, corn syrup, agar, yeast).

179 Our sheet metal troughs (described above) were laid across the width of the plate at nine  
180 positions across the length of the plate. Each tin was filled with 1 L of a mix of ethylene glycol  
181 and water and was placed on the plate once a stable -6°C to -1°C gradient had formed. Nine  
182 metal tins were placed on the plate from one end to the other, which resulted in each vial of flies  
183 being exposed to one of nine temperature points, depending on location. Type-K thermocouples

184 were placed at the bottom of two vials in each tin to record temperatures experienced by the flies.  
185 Adult flies were transferred to empty glass vials and restricted to the bottom 25% of the vial with  
186 a foam stopper. All of the vials were then placed into the metal tins. After 4 h in the cold, flies  
187 were removed and transferred to vials with banana food and left to recover at +25°C. At 2 h, 24  
188 h, and 48 h (after removal from the cold), survival was checked and scored based on whether the  
189 fly was able to stand upright at room temperature. Using the survival scores from 2 h after the  
190 cold stress, we tested for an effect of temperature on the ability of flies to survive at different  
191 temperatures using a generalized linear model with temperature and sex as factors. This model  
192 had a binomial error distribution and a logit-link. We then extracted data from flies exposed to -  
193 2.21°C and used a mixed effects model (with sex and recovery time as factors and vial as a  
194 random effect) to examine how rates of survival changed over time after removal from the cold.

195

### 196 ***Proof of concept 2: Grylloides sigillatus cycling growth***

197 The *Grylloides sigillatus* eggs used for the experiment came from Entomo Farms, in  
198 Norwood, ON, Canada. The eggs were laid at the farm and were transferred to a +25°C incubator  
199 at day one of egg development. Hatchlings that all emerged within a 24 h period were transferred  
200 to a plastic container (24.5 cm x 12.5 cm x 19.5 cm) where they were kept at +33°C with food,  
201 shelter and water and were maintained for two weeks. Each individual was then weighed to the  
202 nearest µg using a microbalance (Sartorius ME5 model) and transferred to a 30 mm petri dish.  
203 Each petri dish contained a 200 µL PCR tube lid filled with cricket diet, a 200 µL  
204 microcentrifuge tube with water and stoppered with cotton, and a folded piece of paper for  
205 shelter. Crickets in their respective Petri dishes were placed directly on the plate at 10 different  
206 locations across the length of the plate in replicates of 10, resulting in a total sample size of 100

207 crickets. The treatment groups (defined by location on the plate) were divided by Styrofoam  
208 barriers to minimize airflow across the plate surface. A light strip was attached to the inside of  
209 the Styrofoam lid and was set at a 12:12 h day and night cycle (lights on at 8 AM).

210 One side of the plate was held at a constant 30°C while the other side was cycled daily  
211 between 20°C and 40°C. The ramp rate was set to increase or decrease by 10°C over 6 h, and a  
212 full cycle was completed every 24 h. Temperatures experienced were measured by placing two  
213 type-K thermocouples into empty cricket containers at the far ends of each treatment group. This  
214 created 10 treatment levels of daily thermal variability experienced by the crickets with those  
215 closest to the cycling end experiencing the widest range of temperatures (+38°C to +22°C).  
216 Water for the crickets was replaced on days 2 and 4 of the 5-day cycling period to ensure the  
217 animals were not water stressed. Once 5 cycles had been completed, the crickets were removed  
218 from the plate, and the body mass of each individual was measured. The effect of thermal cycle  
219 amplitude and initial mass on final mass and the effect of thermal cycle amplitude on proportion  
220 of mass gained over the five-day period were tested using general linear models.

221

## 222 **Results and Discussion**

### 223 *Simple thermal gradients*

224 Based on our design, we predicted that we could achieve linear thermal gradients across  
225 the plate that were stable (Figure 2A). Indeed, stable thermal gradients formed on the gradient  
226 plate when one refrigerated circulator was set to 0°C and the other was set to +10°C, +25°C or  
227 +40°C (Figure 2B). The relationship between distance (across the plate) and temperature always  
228 closely fit simple linear models ( $R^2$  between 0.988 and 0.999; Figure 2C). The intercepts of each  
229 of the gradients were close to the value of the highest set temperature (Figure 2C).

230 In a separate run using circulator settings of constant 0°C and 40°C, we examined the  
231 reliability of temperatures across the width of the plate. The temperature across the width of the  
232 plate was measured to ensure consistent temperatures would be experienced by an organism at  
233 the same position across the length of the plate (Figure 2D). The temperature measured across  
234 the width of the plate was consistent at each location across the length (Figure 2D). The standard  
235 deviation of temperature at each of the positions across the width of the plate varied between 0.3  
236 and 0.6°C (Figure 2D), which is well within the expected error rate of type-K thermocouples  
237 (~1.1°C or 0.4%). Thus, like previously described thermal gradient plates [32], our system can  
238 produce linear temperature gradients across the length of the plate, and these temperatures are  
239 stable over time (Figure 2).

240

#### 241 *Dynamic thermal gradients*

242 The first dynamic gradient we attempted was an upward temperature ramp with one bath  
243 while the other was held at a constant temperature (Figure 3A). This dynamic gradient was  
244 repeated twice with a 2 h (0.17°C min<sup>-1</sup> rate) and 1 h (0.33°C min<sup>-1</sup> rate) ramp being completed  
245 by the bath. Both of these experiments resulted in a range of ramping rates across the plate that  
246 varied linearly with position (Figure 3D, G). Thus, this system can easily be used to study the  
247 effects of temperature ramp rates on organismal performance and fitness. Since we were not  
248 observing animals during this experiment, we used an opaque Styrofoam lid over the plate, but a  
249 clear plastic or glass lid could be used and would allow for experiments requiring continuous  
250 observation during a thermal ramp.

251 To create cycling temperatures, we set one circulator to cycle between high and low  
252 temperatures while the other was held at a constant temperature in the middle of cycle amplitude

253 (Figure 3B). As expected, this set of programs produced predictable temperature cycles of  
254 varying amplitudes across the length of the plate (Figure 3E). The maxima and minima of each  
255 cycle changed linearly across the length of the plate (maxima  $R^2 = 0.995$ , minima  $R^2 = 0.982$ ;  
256 Figure 3H), and thus the amplitude of the temperature variation varied linearly across the plate  
257 ( $R^2 = 0.982$ ; Figure 3I). Thus, our system can be used to study the effects of thermal fluctuations  
258 on survival, growth, reproduction, or any other trait of interest. By testing the system setup while  
259 trialing sample placement, a carefully crafted range of variations in cycle amplitude can be  
260 created and used.

261 As a third and final test of the ability of our system to create dynamic thermal  
262 environments, we simulated a fluctuating thermal regime (FTR). FTR is characterized by a  
263 period of cool temperatures followed by a warm break and is often used to store insects for long  
264 periods for commercial purposes while slowing physiological aging and avoiding long term  
265 effects of low-temperature exposure (Figure 3C). To accomplish this, we held one bath at a  
266 constant temperature (+25°C) while the other bath completed cycles of 0°C with periodic  
267 warming to +25°C. As predicted (Figure 3C), this arrangement produced FTR cycles across the  
268 plate with a consistent temperature for the warm break (+25°C), while the cool “storage”  
269 temperatures varied linearly across the length of the plate (Figure 3F, J;  $R^2 = 0.994$ ). Thus, our  
270 design allows for careful manipulation of sample conditions following stepwise changes in the  
271 thermal program. In the case of FTR cycles, the sample storage or warm “break” temperature can  
272 be independently manipulated to study the effects of these treatments on insect survival or  
273 fitness. This specific application of our design would allow for high-throughput optimization of  
274 commercial or governmental insect storage programs.

275

276 ***Proof of concept 1: Drosophila cold tolerance***

277 We generated a low-temperature survival curve for *Drosophila* from a single use of the  
278 plate (Figure 4A; survival 2 h post-cold stress shown). We noted a sharp decrease in survival in  
279 males and females at approximately  $-2.2^{\circ}\text{C}$ , and while the effect of sex was small (Fig. 4A), the  
280 large sample size contributed to both temperature ( $F_{1,1578}=1945.8$ ,  $P<0.001$ ) and sex  
281 ( $F_{1,1577}=84.6$ ,  $P<0.001$ ) having statistically significant effects on survival. This sex effect was  
282 driven by the fact that males were more tolerant of chilling at just one temperature point in the  
283 assay ( $-2.2^{\circ}\text{C}$ ; Figure 4A). At this temperature, nearly all males were alive 2 h after the cold  
284 stress while c. 70% of females were dead (Fig 4A). Survival was again measured at 24 h, and 48  
285 h following removal from the cold exposure, so we tested whether survival outcomes changed  
286 between males and females in the 48 h following after exposure to  $-2.2^{\circ}\text{C}$  (Figure 4B).  
287 Specifically, while males were far more likely to be scored as alive 2 h following the cold stress,  
288 they were far more likely to die in the ensuing 48 h (Figure 4B; mixed effects model recovery  
289 time x sex interaction:  $F_{1,45}=7.34$ ,  $P=0.002$ ). While females never recovered from chill coma,  
290 males recovered the ability to stand, but then died. These results are similar to our recent report  
291 of latent chilling injury effects in virgin female flies following exposure to  $0^{\circ}\text{C}$  [39], which  
292 suggests that conditions leading to latent injury may be temperature-, sex-, and/or reproductive  
293 status-specific. Recording the same data with smaller sample size or fewer temperatures, over  
294 multiple rounds because of equipment limitations, or not recording survival over multiple time  
295 points could have missed these important differences between the sexes.

296 ***Proof of concept 2: Grylloides sigillatus growth during daily thermal cycles***

297 To test the effects of thermal fluctuations on insect growth, we generated a 24-hour  
298 cycling regime from +40°C to +20°C (Figure 4C) that allowed us to create 10 different cycling  
299 regimes across the plate that varied in the amplitude of thermal fluctuation. We used this  
300 approach to record the growth rates of two-week old crickets over five days (Figure 4D). The  
301 starting weight of each cricket was measured before the start of the cycling regime and at the end  
302 (Figure 4E). We expected thermal variability to negatively impact growth rates. The initial mass  
303 of the cricket strongly predicted the final mass ( $F_{1,116}=61.6$ ,  $P<0.001$ ), but surprisingly the  
304 position of the cricket on the plate (diurnal temperature range) did not affect final mass ( $F_{9,107} =$   
305  $0.7$ ,  $P = 0.743$ ), or interact with initial mass to influence final mass ( $F_{9,98} = 0.4$ ,  $P = 0.909$ ). Most  
306 crickets approximately doubled in mass over the five-day period (Figure 4F). This implies that  
307 none of the cycling regimes created (ranging from 1.6 to 16.6°C of thermal range) resulted in any  
308 effect on growth rates.

309

310 ***Conclusions***

311 The thermal gradient system described and demonstrated here represents a powerful new  
312 approach to characterizing thermal performance in small organisms. This system can be built  
313 from readily available parts and with limited technical knowledge and can be used on a wide  
314 variety of sample types to measure nearly any thermal performance trait. The system produces  
315 stable static and/or predictable dynamic thermal gradients over a large surface area, permitting  
316 high throughput investigations. We are optimistic that this system as described or with creative  
317 improvements can enhance and accelerate research on the ecology, evolution, physiology, and

318 molecular biology of ectothermic organisms, while also making these studies more economical  
319 for researchers with a limited budget.

320

## 321 **Acknowledgments**

322 The authors wish to thank Charlie Reid and Hannah Davis for helpful discussion throughout this  
323 project, the staff at Entomo Farms for providing the crickets, and Matt Muzzatti for useful advice  
324 on caring for the crickets.

325

## 326 **Competing Interests**

327 The authors declare no competing interests.

328

## 329 **Funding**

330 This work was supported by a Natural Sciences and Engineering Research Council (NSERC)  
331 Discovery Grant (RGPIN-2018-05322) and infrastructure funding to H.A.M. from the Canadian  
332 Foundation for Innovation and Ontario Research Fund Small Infrastructure Fund.

333

## 334 **Data Availability**

335 All data described in this manuscript is provided as supplementary material.

336



## 337 References

- 338 [1] M. Schiffer, S. Hangartner, A.A. Hoffmann, Assessing the relative importance of  
339 environmental effects, carry-over effects and species differences in thermal stress resistance: A  
340 comparison of *Drosophilids* across field and laboratory generations, *J. Exp. Biol.* 216 (2013)  
341 3790–3798. DOI: [10.1242/jeb.085126](https://doi.org/10.1242/jeb.085126)
- 342 [2] P. Kern, R.L. Cramp, C.E. Franklin, Physiological responses of ectotherms to daily  
343 temperature variation, *J. Exp. Biol.* 218 (2015) 3068–3076. DOI: [10.1242/jeb.123166](https://doi.org/10.1242/jeb.123166)
- 344 [3] K.L. Hollis, Ants and antlions: The impact of ecology, coevolution and learning on an insect  
345 predator-prey relationship, *Behav. Processes.* 139 (2017) 4–11.  
346 <https://doi.org/10.1016/j.beproc.2016.12.002>
- 347 [4] H.A. MacMillan, J.L. Andersen, V. Loeschcke, J. Overgaard, Sodium distribution predicts  
348 the chill tolerance of *Drosophila melanogaster* raised in different thermal conditions, *Am. J.*  
349 *Physiol. Regul. Integr. Comp. Physiol.* 308 (2015) 823–831. DOI: [10.1152/ajpregu.00465.2014](https://doi.org/10.1152/ajpregu.00465.2014)
- 350 [5] M.R. Frazier, R.B. Huey, D. Berrigan, Thermodynamics constrains the evolution of insect  
351 population growth rates: "Warmer is better", *Am. Nat.* 168 (2006) 512–520.  
352 DOI: [10.1086/506977](https://doi.org/10.1086/506977)
- 353 [6] N. Tüzün, L. Op de Beeck, K.I. Brans, L. Janssens, R. Stoks, Microgeographic differentiation  
354 in thermal performance curves between rural and urban populations of an aquatic insect, *Evol.*  
355 *Appl.* 10 (2017) 1067–1075. DOI: [10.1111/eva.12512](https://doi.org/10.1111/eva.12512)
- 356 [7] D. Santos, J. Vanden Broeck, N. Wynant, Systemic RNA interference in locusts: Reverse  
357 genetics and possibilities for locust pest control, *Curr. Opin. Insect. Sci.* 6 (2014) 9–14. DOI:  
358 [10.1016/j.cois.2014.09.013](https://doi.org/10.1016/j.cois.2014.09.013)
- 359 [8] H.J. MacLean, J.G. Sørensen, T.N. Kristensen, V. Loeschcke, K. Beedholm, V. Kellermann,  
360 J. Overgaard, 2019. Evolution and plasticity of thermal performance: an analysis of variation in  
361 thermal tolerance and fitness in 22 *Drosophila* species, *Phil. Trans. R. Soc. B.* 374, 20180548.  
362 DOI: [10.1098/rstb.2018.0548](https://doi.org/10.1098/rstb.2018.0548)
- 363 [9] J. Overgaard, M.R. Kearney, A.A. Hoffmann, Sensitivity to thermal extremes in Australian  
364 *Drosophila* implies similar impacts of climate change on the distribution of widespread and  
365 tropical species, *Glob. Chang. Biol.* 20 (2014) 1738–1750. DOI: [10.1111/gcb.12521](https://doi.org/10.1111/gcb.12521)
- 366 [10] J.E. Pool, D.T. Braun, J.B. Lack, Parallel evolution of cold tolerance within *Drosophila*  
367 *melanogaster*, *Mol. Biol. Evol.* 34 (2017) 349–360. DOI: [10.1093/molbev/msw232](https://doi.org/10.1093/molbev/msw232)
- 368 [11] J.T. Lennon, V.H. Smith, K. Williams, Influence of temperature on exotic *Daphnia*  
369 *lumholtzi* and implications for invasion success, *J. Plankton. Res.* 23 (2001) 425–433. DOI:  
370 [10.1093/plankt/23.4.425](https://doi.org/10.1093/plankt/23.4.425)
- 371 [12] L. Boardman, J.S. Terblanche, B.J. Sinclair, Transmembrane ion distribution during  
372 recovery from freezing in the woolly bear caterpillar *Pyrrharctia isabella* (Lepidoptera:  
373 Arctiidae), *J. Insect. Physiol.* 57 (2011) 1154–1162. DOI: [10.1016/j.jinsphys.2011.04.022](https://doi.org/10.1016/j.jinsphys.2011.04.022)
- 374 [13] H. Colinet, C. Pineau, E. Com, Large scale phosphoprotein profiling to explore *Drosophila*

- 375 cold acclimation regulatory mechanisms, 2017. Sci. Rep. 7, 1713. DOI: [10.1038/s41598-017-](https://doi.org/10.1038/s41598-017-01974-z)  
376 [01974-z](https://doi.org/10.1038/s41598-017-01974-z)
- 377 [14] R.L. Kobey K.L. Montooth, Mortality from desiccation contributes to a genotype–  
378 temperature interaction for cold survival in *Drosophila melanogaster*, J. Exp. Biol. 216 (2013)  
379 1174 – 1182. DOI: [10.1242/jeb.076539](https://doi.org/10.1242/jeb.076539)
- 380 [15] J.L. Andersen, T. Manenti, J.G. Sørensen, H.A. MacMillan, V. Loeschcke, J. Overgaard,  
381 How to assess *Drosophila* cold tolerance: chill coma temperature and lower lethal temperature  
382 are the best predictors of cold distribution limits, Funct. Ecol. 29 (2015) 55–65. DOI:  
383 [10.1111/1365-2435.12310](https://doi.org/10.1111/1365-2435.12310)
- 384 [16] B.J. Sinclair, L.E. Coello Alvarado, L.V. Ferguson, An invitation to measure insect cold  
385 tolerance: Methods, approaches, and workflow, Journal of Thermal Biology. 53 (2015) 180–  
386 197. DOI: [10.1016/j.jtherbio.2015.11.003](https://doi.org/10.1016/j.jtherbio.2015.11.003)
- 387 [17] C. Christiansen-Jucht, P.E. Parham, A. Saddler, J.C. Koella, M.G. Basáñez, 2014.  
388 Temperature during larval development and adult maintenance influences the survival of  
389 *Anopheles gambiae* s.s., Parasites and Vectors. 7, 489. DOI: [10.1186/s13071-014-0489-3](https://doi.org/10.1186/s13071-014-0489-3)
- 390 [18] J. Chopelet, P.U. Blier, F. Dufresne, Plasticity of growth rate and metabolism in *Daphnia*  
391 *magna* populations from different thermal habitats, J. Exp. Zool. A. Ecol. Genet. Physiol. 309  
392 (2008) 553–562. DOI: [10.1002/jez.488](https://doi.org/10.1002/jez.488)
- 393 [19] M.W. Lachenicht, S. Clusella-Trullas, L. Boardman, C. Le Roux, J.S. Terblanche, Effects of  
394 acclimation temperature on thermal tolerance, locomotion performance and respiratory  
395 metabolism in *Acheta domesticus* L. (Orthoptera: Gryllidae), J. Insect. Physiol. 56 (2010) 822–  
396 830. DOI: [10.1016/j.jinsphys.2010.02.010](https://doi.org/10.1016/j.jinsphys.2010.02.010)
- 397 [20] J.X. Jiang, J.H. Yang, X.Y. Ji, H. Zhang, N.F. Wan, Experimental temperature elevation  
398 promotes the cooperative ability of two natural enemies in the control of insect herbivores, Biol.  
399 Control. 117 (2018) 52–62. DOI: [10.1016/j.biocontrol.2017.09.001](https://doi.org/10.1016/j.biocontrol.2017.09.001)
- 400 [21] I.J. McGaw, N. M. Whiteley, Effects of acclimation and acute temperature change on  
401 specific dynamic action and gastric processing in the green shore crab, *Carcinus maenas*, J.  
402 Therm. Biol. 37 (2012) 570–578. DOI: [10.1016/j.jtherbio.2012.07.003](https://doi.org/10.1016/j.jtherbio.2012.07.003)
- 403 [22] W.D. Crill, R.B. Huey, G.W. Gilchrist, Within- and between-Generation effects of  
404 temperature on the morphology and physiology of *Drosophila melanogaster*, Evolution. 50  
405 (1996) 1205–1218. DOI: [10.1111/j.1558-5646.1996.tb02361.x](https://doi.org/10.1111/j.1558-5646.1996.tb02361.x)
- 406 [23] H. Colinet, B.J. Sinclair, P. Vernon, D. Renault, Insects in fluctuating thermal  
407 environments, Annu. Rev. Entomol. 60 (2015) 123–140. DOI: [10.1146/annurev-ento-010814-](https://doi.org/10.1146/annurev-ento-010814-021017)  
408 [021017](https://doi.org/10.1146/annurev-ento-010814-021017)
- 409 [24] C. Rolandi, J.R.B. Lighton, G.J. de la Vega, P.E. Schilman, J. Mensch, Genetic variation for  
410 tolerance to high temperatures in a population of *Drosophila melanogaster*, Ecol. Evol. 8 (2018)  
411 10374–10383. DOI: [10.1002/ece3.4409](https://doi.org/10.1002/ece3.4409)
- 412 [25] J.S. Terblanche, J.A. Deere, S. Clusella-Trullas, C. Janion, S.L. Chown, Critical thermal  
413 limits depend on methodological context, Proc. R. Soc. B Biol. Sci. 274 (2007) 2935–2943.  
414 DOI: [10.1098/rspb.2007.0985](https://doi.org/10.1098/rspb.2007.0985)

- 415 [26] K.A. Mitchell A.A. Hoffmann, Thermal ramping rate influences evolutionary potential and  
416 species differences for upper thermal limits in *Drosophila*, *Funct. Ecol.* 24 (2010) 694–700.  
417 DOI: [10.1111/j.1365-2435.2009.01666.x](https://doi.org/10.1111/j.1365-2435.2009.01666.x)
- 418 [27] C. Nguyen, M.H. Bahar, G. Baker, N.R. Andrew, 2014. Thermal tolerance limits of  
419 diamondback moth in ramping and plunging assays, *PLoS One.* 9, e87535.  
420 DOI: [10.1371/journal.pone.0087535](https://doi.org/10.1371/journal.pone.0087535)
- 421 [28] J. Overgaard, T.N. Kristensen, J.G. Sørensen, 2012. Validity of thermal ramping assays  
422 used to assess thermal tolerance in arthropods, *PLoS One.* 7, e32758.  
423 DOI: [10.1371/journal.pone.0032758](https://doi.org/10.1371/journal.pone.0032758)
- 424 [29] L.B. Jørgensen, H. Malte, J. Overgaard, How to assess *Drosophila* heat tolerance: Unifying  
425 static and dynamic tolerance assays to predict heat distribution limits, *Funct. Ecol.* 33, (2019)  
426 629–642. DOI: [10.1111/1365-2435.13279](https://doi.org/10.1111/1365-2435.13279)
- 427 [30] V. Kellermann, A.A. Hoffmann, T.N. Kristensen, N.N. Moghadam, V. Loeschke,  
428 Experimental evolution under fluctuating thermal conditions does not reproduce patterns of  
429 adaptive clinal differentiation in *Drosophila melanogaster*, *Am. Nat.* (2015) 582-593.  
430 DOI: [10.1086/683252](https://doi.org/10.1086/683252)
- 431 [31] O. Sayeed, S. Benzer, Behavioral genetics of thermosensation and hygrosensation in  
432 *Drosophila*, *Proc. Natl. Acad. Sci.* 93 (1996) 6079–6084. DOI: [10.1073/pnas.93.12.6079](https://doi.org/10.1073/pnas.93.12.6079)
- 433 [32] P.A. Siver, A new thermal gradient device for culturing algae, *Br. Phycol. J.* 18 (1983) 159–  
434 164. DOI: [10.1080/00071618300650201](https://doi.org/10.1080/00071618300650201)
- 435 [33] J.P. Rinehart, G.D. Yocum, M. West, W.P. Kemp, A fluctuating thermal regime improves  
436 survival of cold-mediated delayed emergence in developing *Megachile rotundata* (Hymenoptera:  
437 Megachilidae), *J. Econ. Entomol.* 104 (2011) 1162–1166. DOI: [10.1603/ec11062](https://doi.org/10.1603/ec11062)
- 438 [34] H. Colinet, T.T.A. Nguyen, C. Cloutier, D. Michaud, T. Hance, Proteomic profiling of a  
439 parasitic wasp exposed to constant and fluctuating cold exposure, *Insect. Biochem. Mol. Biol.* 37  
440 (2007) 1177–1188. DOI: [10.1016/j.ibmb.2007.07.004](https://doi.org/10.1016/j.ibmb.2007.07.004)
- 441 [35] V. Košťál, D. Renault, A. Mehrabianová, J. Bastl, Insect cold tolerance and repair of chill-  
442 injury at fluctuating thermal regimes: Role of ion homeostasis, *Comp. Biochem. Physiol. A Mol.*  
443 *Integr. Physiol.* 147 (2007) 231–238. DOI: [10.1016/j.cbpa.2006.12.033](https://doi.org/10.1016/j.cbpa.2006.12.033)
- 444 [36] K.E. Marshall, B.J. Sinclair, Repeated stress exposure results in a survival–reproduction  
445 trade-off in *Drosophila melanogaster*, *Proc. R. Soc. B.* 277 (2010) 963–969. DOI:  
446 [10.1098/rspb.2009.1807](https://doi.org/10.1098/rspb.2009.1807)
- 447 [37] N.R. Bartholomew, J.M. Burdett, J.M. Vandenbrooks, M.C. Quinlan, G.B. Call, 2015.  
448 Impaired climbing and flight behaviour in *Drosophila melanogaster* following carbon dioxide  
449 anaesthesia, *Sci. Rep.* 5, 15298. DOI: [10.1038/srep15298](https://doi.org/10.1038/srep15298)
- 450 [38] T.L. Nilson, B.J. Sinclair, S.P. Roberts, The effects of carbon dioxide anaesthesia and anoxia  
451 on rapid cold-hardening and chill coma recovery in *Drosophila melanogaster*, *J. Insect. Physiol.*  
452 52 (2006) 1027–1033. DOI: [10.1016/j.jinsphys.2006.07.001](https://doi.org/10.1016/j.jinsphys.2006.07.001)
- 453 [39] M.I. El-Saadi, M.W. Ritchie, H.E. Davis, H.A. MacMillan, 2020. Warm periods in repeated

454 cold stresses protect *Drosophila* against ionoregulatory collapse, chilling injury, and  
455 reproductive deficits, J. Insect. Physiol. 123, 104055. DOI: [10.1016/j.jinsphys.2020.104055](https://doi.org/10.1016/j.jinsphys.2020.104055)  
456

457 **Tables**

458 *Table 1:* List of material to assemble the plate with the dimensions of each item as well as the  
 459 number required. In addition to the other materials, two refrigerated circulating baths were used.  
 460 These can be programmable or non-programmable depending on the experimental design. All  
 461 programs shown herein were conducted with one programmable and one non-programmable  
 462 bath (capable of static temperatures only).

463

| <b>Material</b>                         | <b>Source</b>                                      | <b>Dimensions</b>                                                                              | <b>Quantity</b> |
|-----------------------------------------|----------------------------------------------------|------------------------------------------------------------------------------------------------|-----------------|
| Aluminum plate (solid)                  | Metal Supermarket<br>(local source of stock metal) | 91.4 cm x 45.7 cm x 2.5 cm<br>(36" x 18" x 1")                                                 | 1               |
| Copper tubing – Utility grade           | Hardware store                                     | 0.95cm (3/8") outer diameter<br>and 0.6 mm (0.03") wall<br>thickness<br>49 cm (19.25") lengths | 12 pcs          |
| Copper tubing – Utility grade           | Hardware store                                     | 0.95cm (3/8") outer diameter<br>and 0.6 mm (0.03") wall<br>thickness<br>2 cm lengths           | 20 pcs          |
| Clear vinyl tubing                      | Hardware store<br>Scientific supply store          | 0.95 cm (3/8") inner diameter<br>2.54 cm (1") length                                           | 20 pcs          |
| Aluminum blocks (for manifolds)         | Metal Supermarket<br>(local source of stock metal) | 3.8 cm x 1.3 cm x 1.3 cm<br>(1.5" x 0.5" x 0.5")                                               | 10 pcs          |
| Styrofoam (Rigid foam board insulation) | Hardware Store                                     | 91.4 cm x 11.4 cm                                                                              | 7 pcs           |
|                                         |                                                    | 45.7 cm x 11.4 cm                                                                              | 4 pcs           |
|                                         |                                                    | 111.8 cm x 55.9 cm                                                                             | 2 pcs           |
|                                         |                                                    | 91.4 cm x 45.7 cm<br>(all pcs 1.3 cm (0.5") thick)                                             | 2 pcs           |
| Brass plug                              | Hardware Store                                     | 0.95 cm (3/8"-16 thread)<br>(standard plumbing item)                                           | 10              |
| Marine grade silicone sealant           | Hardware Store                                     | small tube                                                                                     | 1               |

464

465 **Figures**

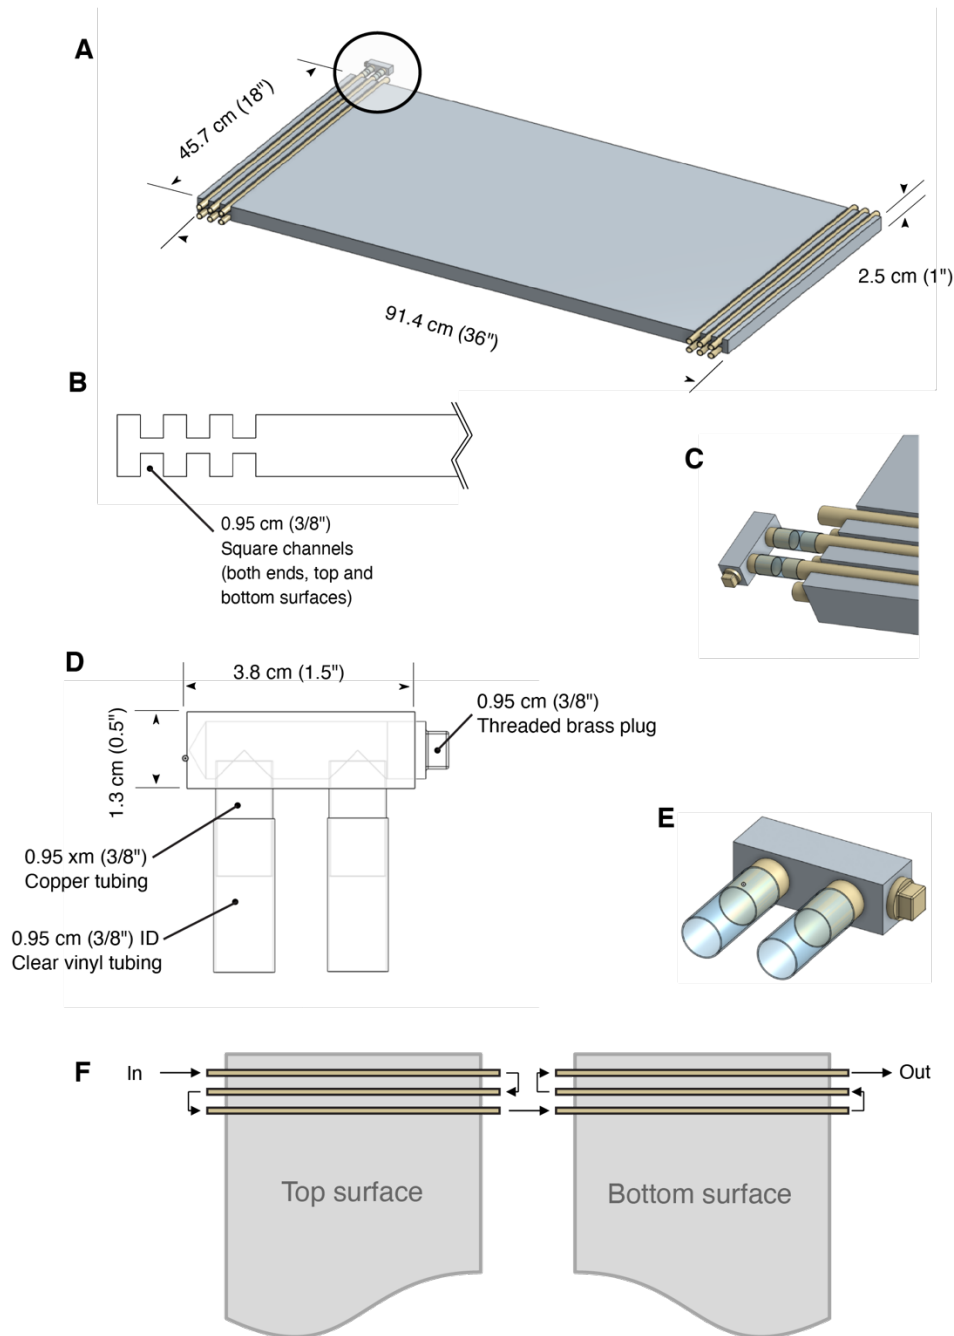

466

467 *Figure 1: Design and dimensions of the thermal gradient plate. A) Assembled plate and copper*  
468 *tubing with example manifold shown in place (circled region). B) Side view of milled square*  
469 *channels in aluminum plate. C) Manifold connection to exposed copper pipe ends using clear*  
470 *vinyl tubing. D) Manifold design from aluminum block, copper pipe, brass plug, and tubing. E)*  
471 *Close-up of example manifold. F) Direction of fluid flow through the system once all manifolds*  
472 *are connected (manifolds not shown for clarity).*

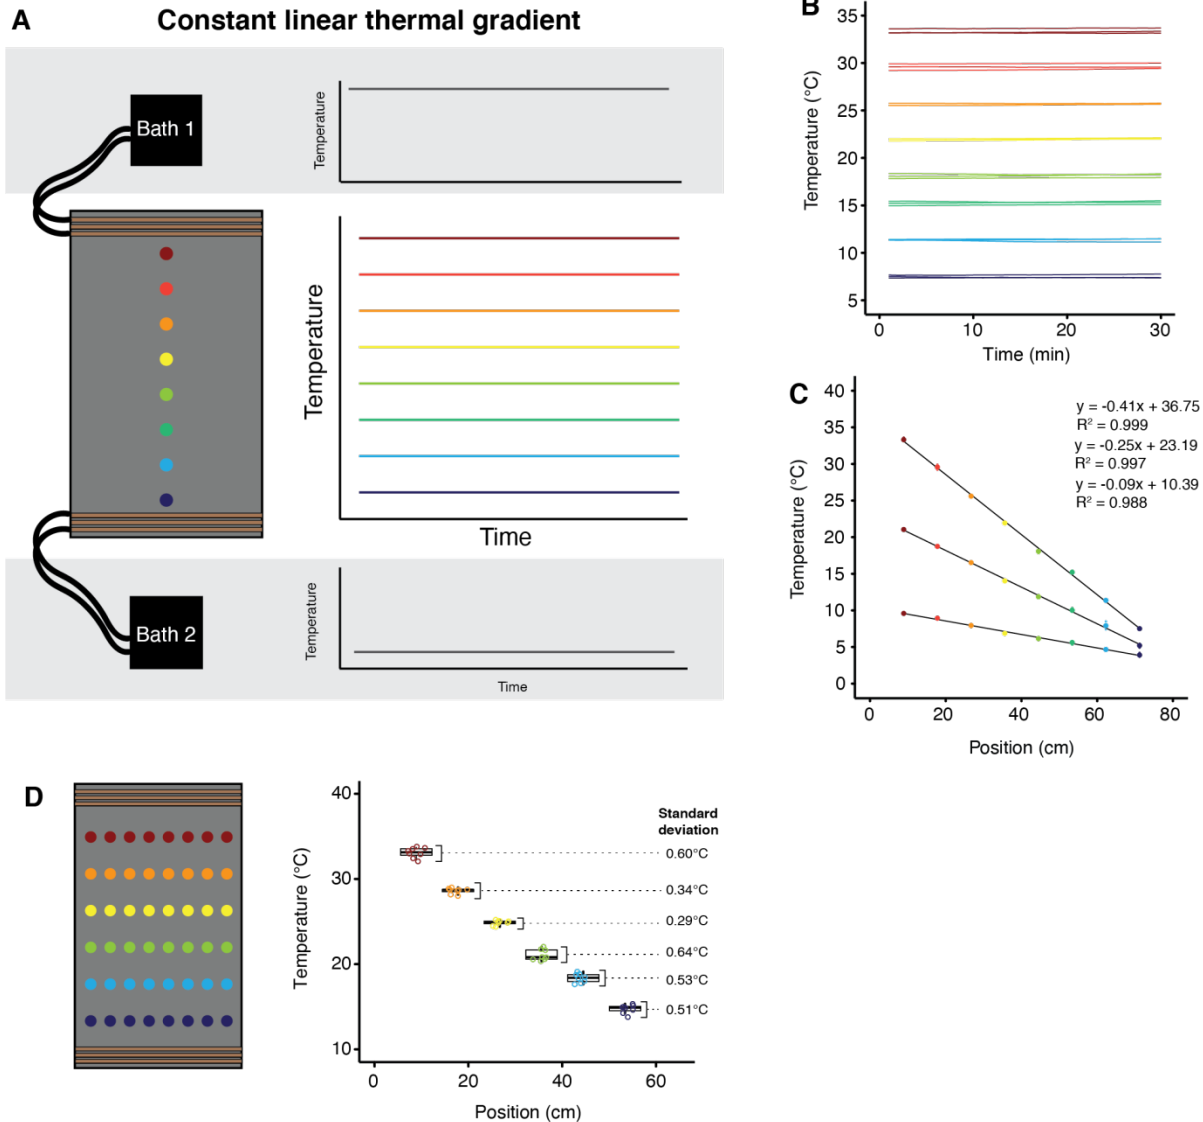

473

474 *Figure 2: Production of stable linear gradients along the length, but not the width of the gradient*  
 475 *plate. A) Probe positions and expected outcomes from establishing constant temperatures at*  
 476 *either end of the gradient plate. B) Actual data recorded at eight locations in the position of the*  
 477 *plate with an established linear gradient. Circulating baths connected to the plate were set to*  
 478 *+40°C (bath 1) and 0°C (bath 2). Each line represents a single type-K thermocouple recording*  
 479 *over a 30 min period (n=3 per position). C) Temperatures recorded at eight locations along the*  
 480 *length of the plate while maintaining a stable gradient. Solid circles represent the mean of three*  
 481 *replicant measurements at each location (open circles, barely visible because of low variance).*  
 482 *Note that the R<sup>2</sup> of the temperature-position relationship is close to 1 (0.988 to 0.999). D)*  
 483 *Measurements of temperature along the width of the plate at several points in the length of the*  
 484 *plate with a thermal gradient of 0 to +40°C. Colors denote position along the length of the plate,*  
 485 *and eight temperature recordings across the width of the plate were made for each position along*  
 486 *its length. Boxplots show the variation of temperature across the plate width.*

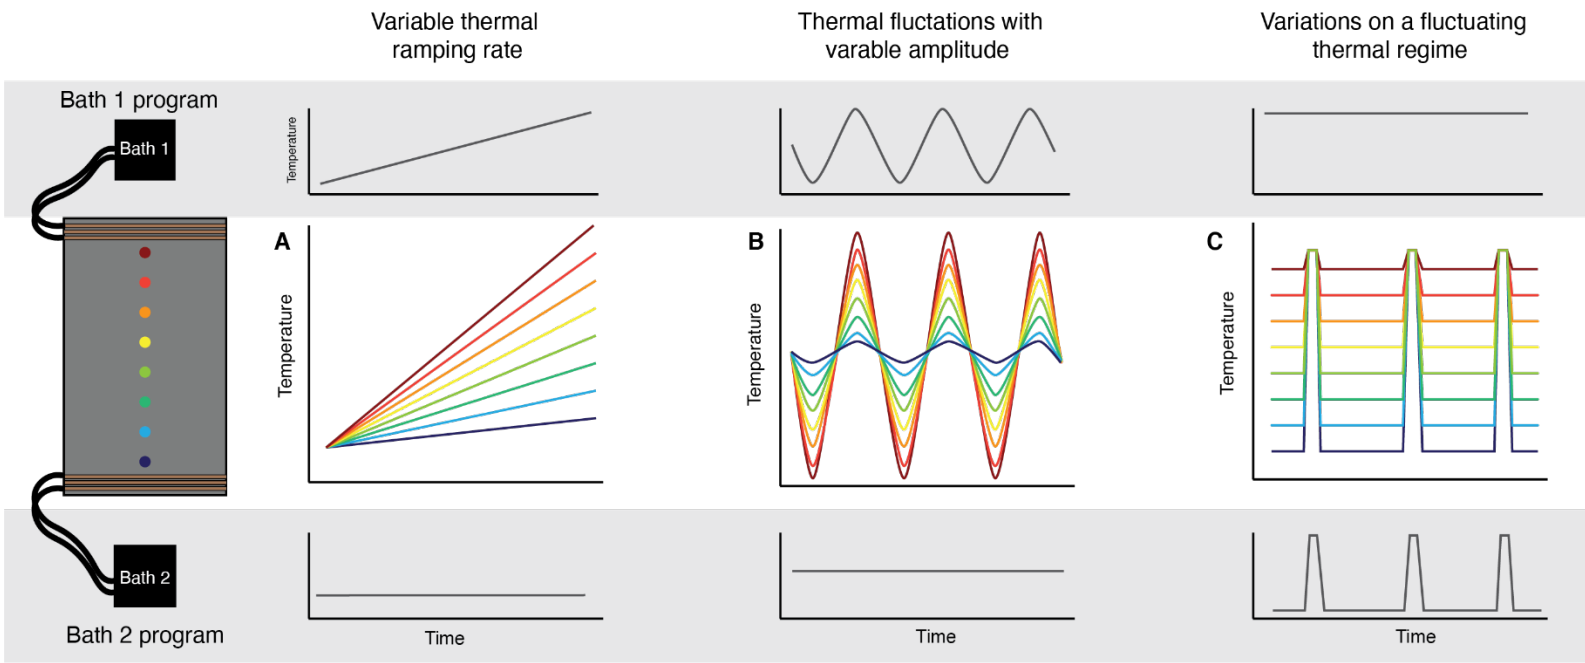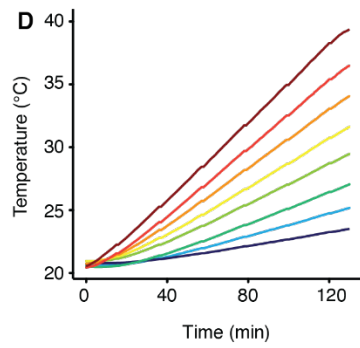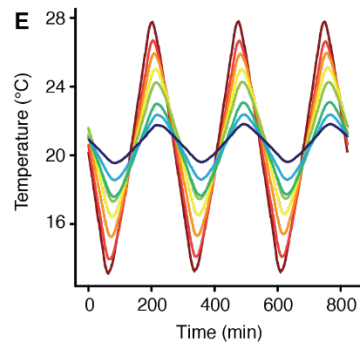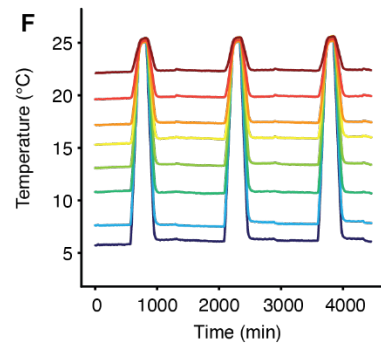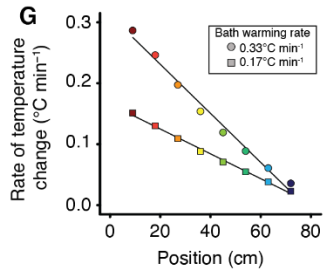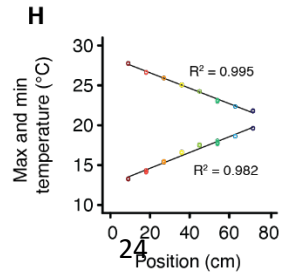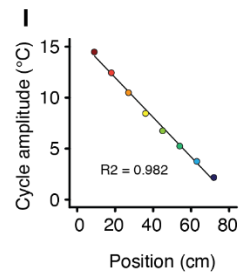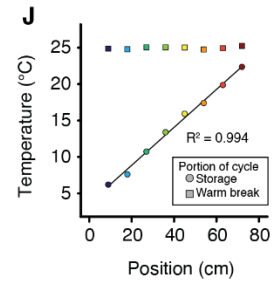



488 *(previous page) Figure 3:* Dynamic thermal gradients allow for complex experiments using  
489 programmable refrigerated circulators. Programs shown produce predictable variations in  
490 warming rate, thermal cycle amplitude, or a chosen aspect of a fluctuating thermal regime over  
491 time. A-C) Expected relationships between time (x-axis) and temperature (y-axis) along the  
492 length of the gradient plate (color represents position across the length of the plate) when baths 1  
493 and 2 are programmed as shown (grey background). D-F) Actual outcomes of bath programming  
494 experiments (temperature recordings over time). Each line represents the temperature of  
495 measurements at each position using type-K thermocouples. G) Rates of temperature change at  
496 each position during two runs using different warming rates of bath 2. This approach creates a  
497 linear relationship between position and thermal ramp rate. H-I) Maximum and minimum  
498 temperatures and cycle amplitude recorded using a cycling program. Cycling temperature of one  
499 bath (bath 1) while holding another constant (bath 2) produces repeatable cycle maxima and  
500 minima that vary by position across the plate and linearly alters cycle amplitude relative to the  
501 position. J) Relationship between temperature and position for cold storage temperature and  
502 warm break period in a fluctuating thermal regime simulation. A single aspect of the program  
503 can be altered predictably across the length of the plate (e.g., storage temp) while holding  
504 another aspect (warm break temperature) constant.

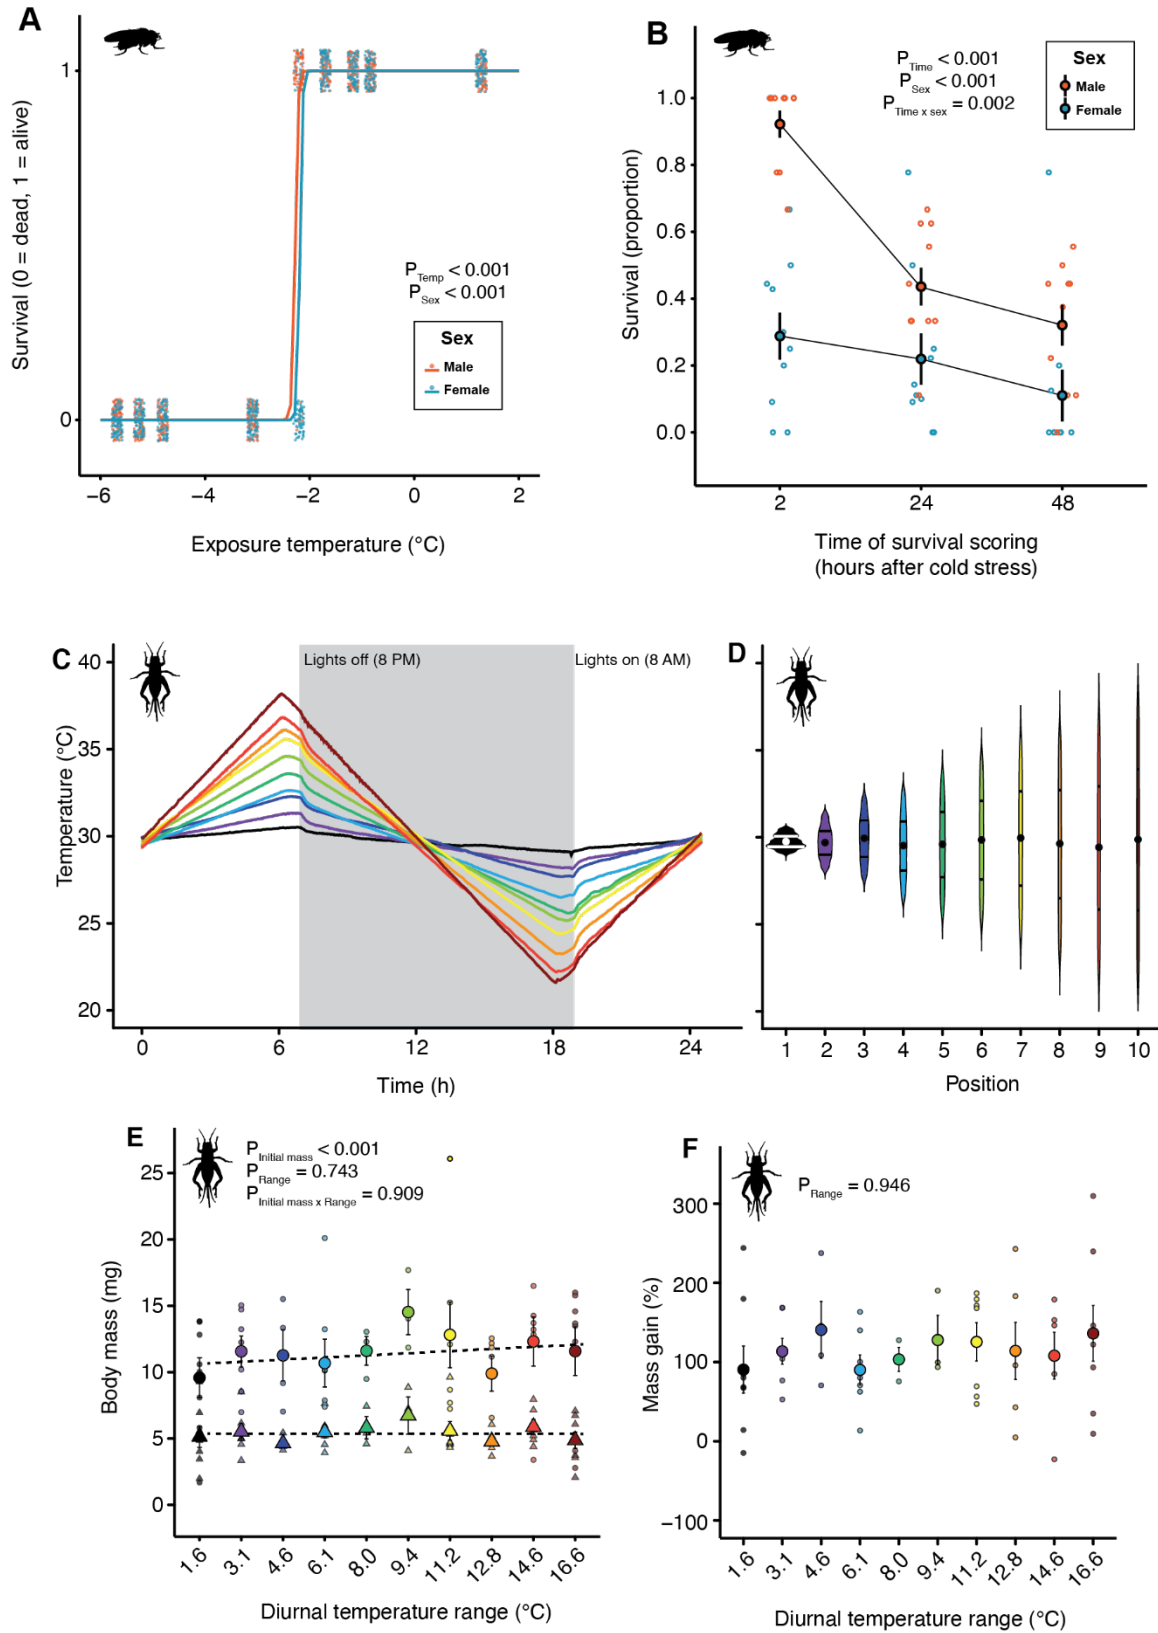

505

506 (previous page) Figure 4: Proof of concept experiments to demonstrate the utility of the dynamic  
507 thermal gradient system. A) Survival of adult male (red) and female (blue) *D. melanogaster*  
508 following constant exposure to different temperatures for 4 h on the thermal plate. Each solid  
509 circle represents an individual fly. 1 = survived, 0 = dead. We noted that males were much more  
510 cold-tolerant when measured specifically at -2.21°C. B) Survival following exposure to -2.21°C  
511 for 4 h in the same flies across multiple rounds of survival assessment (2 h, 24 h, and 48 h).  
512 Although males appear more tolerant of chilling at first, they are more likely to suffer latent  
513 mortality. Each open circle represents an independent vial (containing ~10 flies); solid circles  
514 represent the mean ( $\pm$  sem) survival. C) One day of the diurnal cycling program experienced by  
515 developing crickets (*Gryllodes sigillatus*). Different colours denote 10 different locations across  
516 the length of the plate with temperature ranges from 1.6°C (black) to 16.6°C (dark red). Small  
517 deviations in temperature can be seen when the lights switch on and off. D) Violin plots showing  
518 temperatures experienced by the crickets each day. Width denotes the amount of time spent at a  
519 given temperature. Solid circles denote the mean temperature experienced across the entire day  
520 (constant +30°C across the plate). Horizontal lines denote the 25% and 75% quartiles. E) Initial  
521 (triangles) and final (circles) mass of crickets at each location across the plate. Small symbols  
522 denote individual crickets and large symbols denote the mean  $\pm$  sem. Variance in final body size  
523 was strongly related to initial size, but not significantly impacted by thermal variation. F) The  
524 same is true when adjusting for initial body size by expressing growth as a percentage of initial  
525 mass; thermal variability did not affect growth rates of *G. sigillatus*.
